# Supplementary material for: A 2-week prospective observational study highlights the need to consider neonatal mortality risk factors, even in pregnant women without prior medical history
Source: Research Square preprint supplement (doi:10.21203/rs.3.rs-6709329/v1), 2025-12-01
Supplement: Supplementary file 1 [file 74eedbcf59d97770dd5336b4.docx]

**Table1.** **Baseline characteristics of deliveries with and without severe pregnancy and fetal morbidity indicators for neonatal death** **within 2-weeks post-transport.**

| **Variables** | **Overall** | **No-death** | **Death** | **P** |
| --- | --- | --- | --- | --- |
| Sample size | 3333 | 3292 | 41 |  |
| **Demographics** | | | |  |
| Neonatal sex | | | | 0.213 |
| Girls | 1458 (43.74) | 1444 (43.86) | 14 (34.15) |  |
| Boys | 1875 (56.26) | 1848 (56.14) | 27 (65.85) |  |
| Maternal age | | | | 0.432 |
| <=29y | 1151 (34.53) | 1138 (34.57) | 13 (31.71) |  |
| 30-34y | 1550 (46.50) | 1533 (46.57) | 17 (41.46) |  |
| >=35y | 632 (20.79) | 621 (20.79) | 11 (26.83) |  |
| Birth weight | 3020.0 (2320.0-3460.0) | 3030.0 (2340.0-3465.0) | 2200.0 (1170.0-3200.0) | <0.001 |
| Gestational age | 38.0 (35.0-40.0) | 38.0 (35.0-40.0) | 34.0 (28.0-38.0) | <0.001 |
| **Pregnancy risk factors** | | | |  |
| In vitro fertilization | | | | 0.422 |
| No | 3289 (98.68) | 3249 (98.69) | 40 (97.56) |  |
| Yes | 44 (1.32) | 43 (1.31) | 1 (2.44) |  |
| Premature rupture of membrane | | | | 0.374 |
| No | 2752 (82.57) | 2716 (82.50) | 36 (87.80) |  |
| Yes | 581 (17.43) | 576 (17.50) | 5 (12.20) |  |
| Placenta previa/ accreta | | | | 0.609 |
| No | 3258 (97.75) | 3218 (97.75) | 40 (97.56) |  |
| Yes | 75 (2.25) | 74 (2.25) | 1 (2.44) |  |
| Threatened abortion | | | | 0.018 |
| No | 3316 (99.49) | 3277 (99.54) | 39 (95.12) |  |
| Yes | 17 (0.51) | 15 (0.46) | 2 (4.88) |  |
| Intrauterine infection | | | | 0.497 |
| No | 3278 (98.35) | 3238 (98.36) | 40 (97.56) |  |
| Yes | 55 (1.50) | 54 (1.64) | 1 (2.44) |  |
| Amniotic fluid contamination | | | | 0.631 |
| No | 3237 (97.12) | 3196 (97.08) | 40 (100.00) |  |
| Yes | 96 (2.88) | 96 (2.92) | 0 (0.00) |  |
| Fetal intrauterine distress | | | | 0.648 |
| No | 3221 (96.64) | 3182 (96.66) | 39 (95.12) |  |
| Yes | 112 (3.36) | 110 (3.34) | 2 (4.88) |  |
| **Neonatal events** | | | |  |
| Apgar score | | | |  |
| at 1 min >7 | 3306 (99.19) | 3266 (99.21) | 40 (97.56) | 0.285 |
| at 1 min <=7 | 27 (0.81) | 26 (0.79) | 1 (2.44) |  |
| at 5 min >7 | 3328 (99.85) | 3287 (99.85) | 41 (100.00) | 1.000 |
| at 5 min <=7 | 5 (0.15) | 5 (0.15) | 0 (0.00) |  |
| at 10 min >7 | 3322 (99.67) | 3281 (99.67) | 41 (100.00) | 1.000 |
| at 10 min <=7 | 11 (0.33) | 11 (0.33) | 0 (0.00) |  |
| Neonatal shock | | | | 0.094 |
| No | 3325 (99.76) | 3285 (99.79) | 40 (97.56) |  |
| Yes | 8 (0.24) | 7 (0.21) | 1 (2.44) |  |
| Intraventricular hemorrhage | | | | 0.072 |
| No | 3327 (99.82) | 3287 (99.85) | 40 (97.56) |  |
| Yes | 6 (0.18) | 5 (0.15) | 1 (2.44) |  |
| Seizure | | | | 0.014 |
| No | 3318 (99.55) | 3279 (99.61) | 39 (95.12) |  |
| Yes | 15 (0.45) | 13 (0.39) | 2 (4.88) |  |
| History of perinatal asphyxia | | | | <0.001 |
| No | 3231 (96.94) | 3195 (97.05) | 36 (87.80) |  |
| Yes | 102 (3.06) | 97 (2.95) | 5 (12.20) |  |
| Neonatal respiratory distress syndrome | | | | 0.326 |
| No | 2860 (85.81) | 2827 (85.87) | 33 (80.49) |  |
| Yes | 473 (14.19) | 465 (14.13) | 8 (19.51) |  |
| Pneumonia | | | | 0.110 |
| No | 3113 (99.94) | 3290 (99.94) | 41 (100.00) |  |
| Yes | 2 (0.06) | 2 (0.06) | 0 (0.00) |  |
| Necrotizing enterocolitis | | | | 1.000 |
| No | 3326 (99.79) | 3285 (99.79) | 41 (100.00) |  |
| Yes | 7 (0.21) | 7 (0.21) | 0 (0.00) |  |
| Sepsis | | | | 1.000 |
| No | 3323 (99.70) | 3282 (99.70) | 41 (100.00) |  |
| Yes | 10 (0.30) | 10 (0.30) | 0 (0.00) |  |
| Resuscitation | | | | 1.000 |
| No | 3328 (99.85) | 3287 (99.85) | 41 (100.00) |  |
| Yes | 5 (0.15) | 5 (0.15) | 0 (0.00) |  |
| Congenital heart disease | | | | 0.254 |
| No | 3254 (97.63) | 3215 (97.66) | 49 (96.08) |  |
| Yes | 79 (2.37) | 77 (2.34) | 2 (4.88) |  |
| Newborn teratogenesis | |  |  |  |
| No | 3257 (97.72) | 3224 (97.93) | 33 (80.49) | <0.001 |
| Yes | 76 (2.28) | 68 (2.07) | 8 (19.51) |  |
| **Neonatal transport situation** | | | |  |
| Time to the referral site | | | | 0.483 |
| <=30min | 2360 (70.81) | 2333 (70.87) | 27 (65.85) |  |
| >30min | 973 (29.19) | 959 (29.13) | 14 (34.15) |  |
| The time from birth to referral | | | | 0.264 |
| <=24h | 2846 (85.39) | 2808 (85.30) | 38 (92.68) |  |
| >24h | 487 (14.61) | 484 (14.70) | 3 (7.32) |  |

**Table 2. Factors associated with neonatal death in univariable and multivariable analysis among newborns within 2 weeks post-transport.**

|  | **Model 1** | | **Mode 2** | | **Mode 3** | | **Mode 4** | |
| --- | --- | --- | --- | --- | --- | --- | --- | --- |
| **Variables** | **OR** | **P** | **OR** | **P** | **OR** | **P** | **OR** | **P** |
| Gestational age | 0.81 (0.75-0.86) | <0.001 | 0.81 (0.75-0.86) | <0.001 | 0.80 (0.74-0.85) | <0.001 | 0.81 (0.75-0.87) | <0.001 |
| Birth weight | 0.99 (0.98-0.99) | <0.001 | 0.99 (0.98-0.99) | <0.001 | 0.99 (0.98-0.99) | <0.001 | 0.99 (0.98-0.99) | <0.001 |
| Threatened abortion |  |  |  |  |  |  |  |  |
| No | Ref. |  | Ref. |  | Ref. |  | Ref. |  |
| Yes | 11.20 (2.48-50.70) | 0.002 | 11.13 (2.44-50.71) | 0.002 | 10.20 (2.22-46.77) | 0.003 | 8.66 (1.86-40.35) | 0.006 |
| History of perinatal asphyxia | |  |  |  |  |  |  |  |
| No | Ref. |  | Ref. |  | Ref. |  | Ref. |  |
| Yes | 4.57 (1.76-11.91) | 0.002 | 4.52 (1.61-12.72) | 0.004 | 4.44 (1.57-12.55) | 0.005 | 3.68 (1.30-10.48) | 0.014 |
| Intraventricular hemorrhage | |  |  |  |  |  |  |  |
| No | Ref. |  | Ref. |  | Ref. |  | Ref. |  |
| Yes | 16.44 (1.88-143.88) | 0.011 | 15.10 (1.70-133.80) | 0.015 | 16.14 (1.81-144.17) | 0.013 | 15.94 (1.68-151.29) | 0.016 |
| Neonatal shock |  |  |  |  |  |  |  |  |
| No | Ref. |  | Ref. |  | Ref. |  | Ref. |  |
| Yes | 11.73 (1.41-97.58) | 0.023 | 13.75 (1.63-116.30) | 0.016 | 13.72 (1.61-116.83) | 0.017 | 17.71 (1.78-175.85) | 0.014 |
| Teratogenesis | |  |  |  |  |  |  |  |
| No | Ref. |  | Ref. |  | Ref. |  | Ref. |  |
| Yes | 11.49 (5.12-25.81) | <0.001 | 11.30 (5.01-25.52) | <0.001 | 10.18 (4.32-23.99) | <0.001 | 10.12 (4.01-25.57) | <0.001 |
| Seizure |  |  |  |  |  |  |  |  |
| No | Ref. |  | Ref. |  | Ref. |  | Ref. |  |
| Yes | 12.93 (2.82-59.25) | 0.001 | 12.65 (2.71-59.04) | 0.001 | 9.32 (1.85-46.91) | 0.007 | 8.45 (1.67-42.67) | 0.010 |

**Abbreviations:** OR: Odds Ratio; Model 1: Unadjusted; Model 2: Adjusted for maternal age, gender, Apgar scores, in vitro fertilization; Model 3: On the basis of model 2, pregnancy risk factors in Table 1 were added and adjusted; Model 4: Further adjusted for neonatal events and neonatal transport factors.

**Table 3.** **Interactions between gestational weeks and birth weight indices on the** **risk of** **neonatal death.**

| **Group** | **Odds Ratio (OR) for mortality risks (95% CI)** | | | |  |  |
| --- | --- | --- | --- | --- | --- | --- |
|  | **Model 1** | **Model 2** | **Model 3** | **Model 4** | **P for trend** | **Interactive effect** |
| **Gestational age** |  |  |  |  | <0.001 | RERI= -5.59 (-33.25, 22.08)  AP= -0.66 (-3.97, 2.66)  SI= 0.57 (0.07-4.98)  P for INTM=0.362 |
| **<=33 weeks** | 4.28 (2.28-7.97) *** | 4.18 (2.21-7.81) *** | 4.92 (2.57-9.38) *** | 4.09 (2.11-7.87) *** |  |
| **>33 weeks** | 0.23 (0.13-0.44) *** | 0.24 (0.13-0.45) *** | 0.20 (0.11-0.39) *** | 0.25 (0.13-0.47) *** |  |
| **Birth weight** |  |  |  |  | <0.001 |
| **<=1530 g** | 7.79 (3.98-14.74) *** | 7.73 (3.92-14.71) *** | 8.71 (4.37-16.82) *** | 7.63 (3.78-14.98) *** |  |
| **>1530 g** | 0.13 (0.07-0.25) *** | 0.13 (0.07-0.26) *** | 0.12 (0.06-0.23) *** | 0.13 (0.07-0.26) *** |  |

**Abbreviations:** The value in bold denotes significant differences (*p < 0.05, **p < 0.01, ***p < 0.001). Model 1: Unadjusted; Model 2: Adjusted for maternal age, gender, Apgar scores, in vitro fertilization; Model 3: On the basis of model 2, pregnancy risk factors in Table 1 were added and adjusted; Model 4: Further adjusted for neonatal events and neonatal transport factors. RERI: relative excess risk due to interaction; AP: attributable proportion due to interaction; SI: synergy index; INTM: multiplicative interaction.
